# Supplementary material for: Rationale for azithromycin in COVID-19: an overview of existing evidence
Source: PubMed Central journal article supplement — BMJ Open Respir Res. 2021 Jan 13;8(1):e000806. doi: 10.1136/bmjresp-2020-000806 (PMC7811960; doi:10.1136/bmjresp-2020-000806), 2021-01-13
Supplement: bmjresp-2020-000806supp001.pdf [file bmjresp-2020-000806supp001.pdf]

Supplementary figure A: study selection flowchart

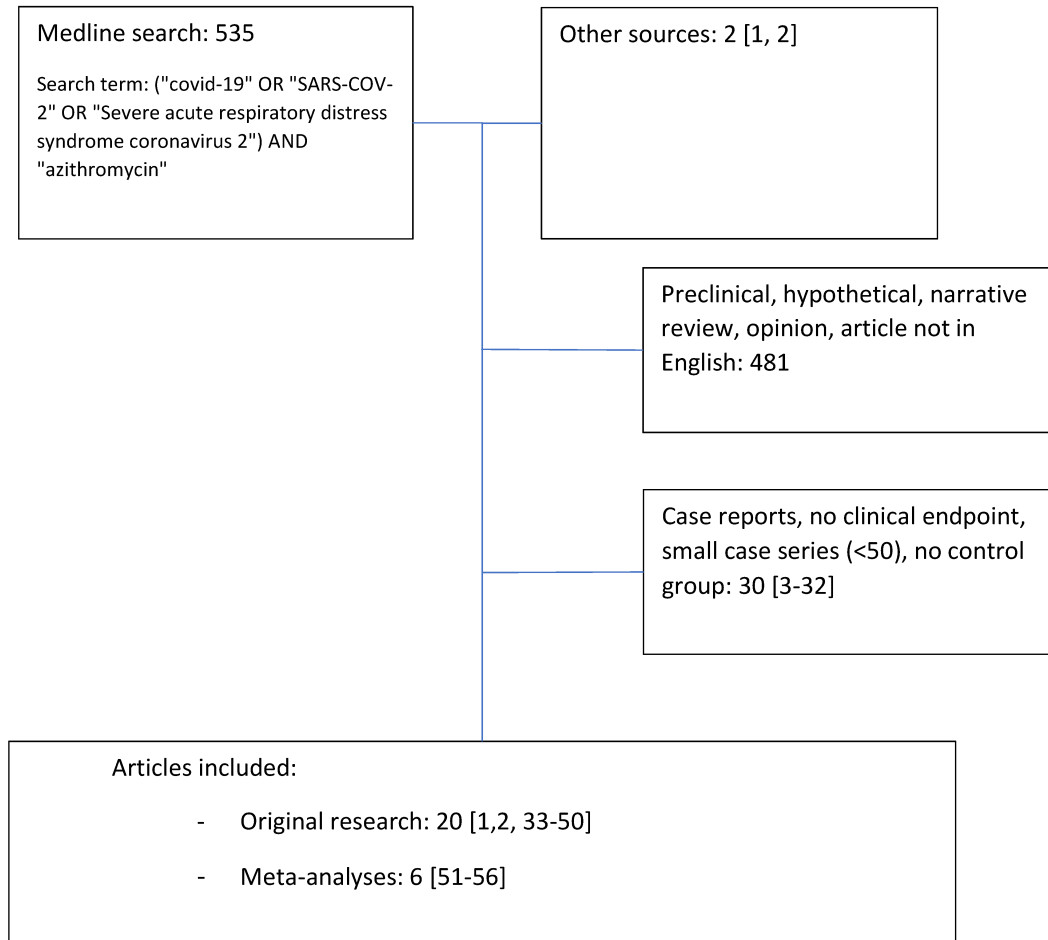

Supplementary table A: studies assessing azithromycin (monotherapy and combination therapies)

| Reference                             | Study type and setting                                                                                                    | Treatment/intervention                                                                                                                                                                                                            | Outcome                                                                                                                                                             | Results                                                                                                                                                                                                                                                      | Safety                                                                       | Limitations, remarks                                                                                                                                                                                                                                                                                                                                  |
|---------------------------------------|---------------------------------------------------------------------------------------------------------------------------|-----------------------------------------------------------------------------------------------------------------------------------------------------------------------------------------------------------------------------------|---------------------------------------------------------------------------------------------------------------------------------------------------------------------|--------------------------------------------------------------------------------------------------------------------------------------------------------------------------------------------------------------------------------------------------------------|------------------------------------------------------------------------------|-------------------------------------------------------------------------------------------------------------------------------------------------------------------------------------------------------------------------------------------------------------------------------------------------------------------------------------------------------|
| ORIGINAL RESEARCH                     |                                                                                                                           |                                                                                                                                                                                                                                   |                                                                                                                                                                     |                                                                                                                                                                                                                                                              |                                                                              |                                                                                                                                                                                                                                                                                                                                                       |
| Kuderer et al.<br>May 2020<br>[33]    | Multicentric, retrospective cohort study<br><br>Cancer patients with confirmed or probable diagnosis, in- and outpatients | <b>HQ alone (n = 89)</b><br><b>AZ alone (n = 93)</b><br><b>HQ + AZ (n = 181)</b><br><b>Neither (n = 486)</b><br><br><i>Dosing:</i><br><i>Not reported</i>                                                                         | 30-day mortality                                                                                                                                                    | Multivariable adjusted odds ratios for all-cause mortality:<br>- HQ vs neither: OR, 1.06; 95% CI, 0.51 - 2.20<br>- AZ vs neither: OR, 1.30; 95% CI 0.65 - 2.64<br>- AZ + HQ vs neither: OR, 2.93; 95% CI, 1.79 – 4.79                                        | Not reported                                                                 | - Adjusted for baseline patient characteristics, but not for disease severity<br>- Secondary endpoint of severe illness (composite of death, hospital admission, ICU admission) was associated with both AZ or HQ + AZ, for which indication bias by disease severity is a more plausible explanation than worsening with association of azithromycin |
| Geleris et al.<br>June 2020<br>[2]    | Monocentric, retrospective cohort study, USA<br><br>Hospitalized patients with confirmed infection                        | <b>HQ + AZ (n = 486)</b><br><b>HQ alone (n = 325)</b><br><b>AZ alone (n = 127)</b><br><b>Other (n = 438)</b><br><br><i>Dosing:</i><br><i>HQ: 600mg bid day 1, 400mg od day 2-5</i><br><i>AZ: 500mg od day 1, 250mg od day 2-5</i> | Time from study baseline to intubation or death (for patients who died after intubation, the timing of the primary end point was defined as the time of intubation) | Multivariable Cox model with inverse probability weighting according to propensity score for composite endpoint:<br>- no significant association between treatment with azithromycin and the composite end point (hazard ratio, 1.03; 95% CI, 0.81 to 1.31). | Not reported                                                                 | - Data extracted from clinical data warehouse; no data were manually extracted from electronic medical records                                                                                                                                                                                                                                        |
| Rosenberg et al.<br>June 2020<br>[34] | Multicentric, retrospective cohort study, USA<br><br>Hospitalized patients with confirmed infection                       | <b>HQ alone (n = 271)</b><br><b>AZ alone (n = 211)</b><br><b>HQ + AZ (n = 735)</b><br><b>neither (221)</b><br><br><i>Dosing:</i><br><i>Different regimens</i>                                                                     | In hospital mortality                                                                                                                                               | Adjusted Cox regression hazard ratio for mortality<br>- HQ + AZ vs neither: HR, 1.35; 95% CI, 0.76 - 2.40; p = 0.31<br>- HQ alone vs neither: HR, 1.08; 95% CI, 0.63 - 1.85; p = 0.79<br>- AZ alone vs neither: HR, 0.56; 95% CI, 0.27 - 1.56; p = 0.14      | Cardiac arrest more likely in HQ + AZ but not in either AZ alone or HQ alone | - Adverse events recorded at any point during hospitalization, potentially before drug initiation<br>- Some potential confounders (e.g. inflammatory markers) not available for multivariate analysis<br>- Mortality endpoint was not adjusted for MV or CPAP                                                                                         |

|                                        |                                                                                                                   |                                                                                                                                                                                                                                                      |                                                                              |                                                                                                                                                                                                                                                                                                                                                                     |                                                                                                                                                                                                                                                                    |                                                                                                                                                                                                                                                                                                                                                                                                |
|----------------------------------------|-------------------------------------------------------------------------------------------------------------------|------------------------------------------------------------------------------------------------------------------------------------------------------------------------------------------------------------------------------------------------------|------------------------------------------------------------------------------|---------------------------------------------------------------------------------------------------------------------------------------------------------------------------------------------------------------------------------------------------------------------------------------------------------------------------------------------------------------------|--------------------------------------------------------------------------------------------------------------------------------------------------------------------------------------------------------------------------------------------------------------------|------------------------------------------------------------------------------------------------------------------------------------------------------------------------------------------------------------------------------------------------------------------------------------------------------------------------------------------------------------------------------------------------|
| Arshad et al.<br>July 2020<br>[35]     | Multicentric, retrospective cohort study, USA<br><br>Hospitalized patients with confirmed infection               | <b>HQ alone (n = 1202)</b><br><b>AZ alone (n = 147)</b><br><b>HQ + AZ (n = 783)</b><br><b>Neither</b><br><br><i>Dosing:</i><br><i>HQ: 400mg bid day 1 and 200mg bid day 2-5</i><br><i>AZ: 500mg od day 1, 250 od day 2-5</i>                         | In-hospital mortality                                                        | Adjusted Cox regression hazard ratio for mortality<br>- HQ alone vs neither: HR, 0.340; 95% CI, 0.254 - 0.455; p<0.001<br>- AZ alone vs neither: HR, 1.050; 95% CI 0.682 - 1.616; p = 0.825<br>- HQ + AZ vs neither: HR, 0.294; 95% CI, 0.218 - 0.396; p<0.001<br>NB: 190 propensity matched HQ patients vs 190 neither: HR, 0.487; 95% CI 0.285 - 0.832; p = 0.009 | - No patient had documented torsade de pointes.<br>- Suggests no differences between treatment arms, although specific data not provided.                                                                                                                          | - More steroid use in treated patients (although corrected for in propensity matching, however no propensity matching was done for azithromycin effect)<br>- Immortal time bias<br>- Discrepancy between higher mortality and lower ICU stay in not-treated group may depend on patient characteristics not accounted for in multivariate analysis (e.g. no treatment because palliative care) |
| Tanriverdi et al.<br>July 2020<br>[36] | Monocentric, retrospective cohort study, Turkey<br><br>Hospitalized patients with probable or confirmed infection | <b>HQ alone (n=30)</b><br><b>HQ + AZ (n =26)</b><br><b>HQ + favipiravir (n = 9)</b><br><b>HQ + lopinavir/ritonavir (n = 18)</b><br><br><i>Dosing:</i><br><i>HQ: 400mg bid day 1, 200mg bid day 2-10</i><br><i>AZ: 500mg od day 1, 250 od day 2-5</i> | Clinical course, duration of hospitalization, mortality, ...                 | Duration of hospitalization:<br>- subgroup analysis of HQ + AZ vs HQ + other antibiotic: 6.68 days vs 8.16 days; p = 0.027<br><br>No difference in other outcomes including mortality, ICU admission                                                                                                                                                                | No unexpected arrhythmia or cardiac event observed.                                                                                                                                                                                                                | - 51% were probable cases without PCR confirmation<br>- Small sample size<br>- AZ patients recruited after guidance update, possible increased experience with COVID patients not accounted for                                                                                                                                                                                                |
| Satlin et al.<br>July 2020<br>[37]     | Multicentric, retrospective cohort study, USA<br><br>Hospitalized patients with confirmed infection               | <b>HQ alone (n = 132)</b><br><b>HQ + AZ (n =27)</b><br><br><i>HQ: 600mg bid day 1, 400mg od day 2-5</i><br><i>AZ: 500mg bid day 1, 250mg od day 2-5</i>                                                                                              | Safety, tolerability and clinical outcomes (hypoxia, need for MV, mortality) | Multivariate adjusted odds ratio for hypoxia improvement<br>- HQ + ≥3 days of azithromycin vs HQ alone: multivariate adjusted OR, 0.99; 95% CI, 0.38 – 2.60; p not reported<br><br>Multivariate adjusted odds ratio for mortality<br>- HQ + ≥3 days of azithromycin vs HQ alone: OR, 1.14; 95% CI, 0.37–3.50; p not reported                                        | QTc increased above 500ms in 47 of 117 patients who had ECG follow up, of which 3 concomitantly used azithromycin.<br><br>Only 1 patient developed non-sustained monomorphic VT and this was in the HQ alone group. No other ventricular tachycardia was reported. | - Small sample size with low number of AZ patients<br>- Univariate prefiltering and small sample size may have excluded confounders from the multivariate model                                                                                                                                                                                                                                |

|                                        |                                                                                                                                                     |                                                                                                                                                                                                                      |                                            |                                                                                                                                                                                                                                                                                                                                                          |                                                                                                                                                                                                                                                                                                                                             |                                                                                                                                                                                                                        |
|----------------------------------------|-----------------------------------------------------------------------------------------------------------------------------------------------------|----------------------------------------------------------------------------------------------------------------------------------------------------------------------------------------------------------------------|--------------------------------------------|----------------------------------------------------------------------------------------------------------------------------------------------------------------------------------------------------------------------------------------------------------------------------------------------------------------------------------------------------------|---------------------------------------------------------------------------------------------------------------------------------------------------------------------------------------------------------------------------------------------------------------------------------------------------------------------------------------------|------------------------------------------------------------------------------------------------------------------------------------------------------------------------------------------------------------------------|
| Cavalcanti et al.<br>July 2020<br>[38] | Multicentric, open label randomized controlled trial, Brazil<br><br>Hospitalized patients with confirmed infection, mild to moderate disease        | <b>HQ alone (n = 159)</b><br><b>HQ + AZ (n = 172)</b><br><b>Neither (n = 173)</b><br><br><i>Dosing:</i><br>HQ: 400mg bid for 7 days<br>AZ: 500mg od for 7days                                                        | Clinical status on day 15 on ordinal scale | Proportional odds of having a worse score at day 15:<br>- HQ +AZ vs SOC: OR 0.99; 95% CI, 0.57 - 1.73; p=1.00<br>- HQ alone vs SOC: OR, 1.21; 95% CI, 0.69 - 2.11; p=1.00<br>- HQ + AZ vs HQ alone: OR, 0.82; 95% CI, 0.47 - 1.43; p=1.00                                                                                                                | - Safety population also included AZ alone patients.<br>- More AE reported in HQ + AZ group or HQ alone group than in AZ alone group and neither group<br>- Prolongation of QT and elevated liver enzymes were more common in HQ alone group or HQ + AZ group than in neither group (however more serial ECG follow up in treated patients) | - Point of estimate instead of cox regression                                                                                                                                                                          |
| Guerin et al.<br>July 2020<br>[1]      | Prospective observational study in MDs and their relatives, France<br><br>Outpatients with flu-like symptoms with confirmed and suspected infection | <b>AZ alone (n = 34)</b><br><b>AZ + HQ (n = 20)</b><br><b>Neither (n = 34)</b><br><br><i>Dosing:</i><br>AZ: 500mg od day 1, 250mg od day 2-5<br>HQ: 600mg od for 7 to 10 days                                        | Time to complete clinical recovery         | Mean times to achieve clinical recovery<br>- Neither: 25.8 days<br>- AZ: 12.9 days (p < 0.0001 for AZ vs neither)<br>- AZ + HQ: 9.2 days (p < 0.0001 for AZ + HQ vs neither; p = 0.26 for AZ vs AZ + HQ)<br><br>Similar results with Logrank analysis. Similar results in case-control analysis (3x19 patients matched for age, sex and body mass index) | - No serious adverse event nor cardiovascular events were reported in any treatment group (ECG done before initiation of HQ in all patients)<br>- Gastrointestinal adverse events reported in treatment group                                                                                                                               | - 42% of patients were not PCR confirmed<br>- Some patients were not treated because of contra-indications, which may signal more comorbid untreated population<br>- Matched controls not matched for disease severity |
| Monforte et al.<br>July 2020<br>[39]   | Monocentric, retrospective cohort study, Milan<br><br>Hospitalized patients with confirmed infection                                                | <b>HQ alone (n = 197)</b><br><b>HQ + AZ (n = 94)</b><br><b>Neither (n = 92), but 47 received other treatment (lopinavir, darunavir, steroids or other immunomodulatory drugs)</b><br><br><i>Dosing: not reported</i> | In-hospital mortality                      | Adjusted hazard ratio for in hospital mortality:<br>- HQ vs neither: HR, 0.66; 95% CI, 0.39 – 1.11; p = 0.118<br>- HQ + AZ vs neither: HR, 0.44; 95%CI, 0.24 – 0.82; p = 0.009<br><br>NB: treatment effectiveness was more substantial in less severe cases                                                                                              | Not reported                                                                                                                                                                                                                                                                                                                                |                                                                                                                                                                                                                        |
| Ip et al.<br>August 2020<br>[40]       | Multicentric, retrospective cohort study, USA<br><br>Hospitalized patients with confirmed infection                                                 | <b>HQ alone (n = 441)</b><br><b>AZ alone (n = 256)</b><br><b>HQ + AZ (n = 1473)</b><br><b>Neither (n = 342)</b><br><br><i>Dosing: heterogeneous</i>                                                                  | 30-day mortality                           | Propensity score stratification adjusted hazard ratio for 30-day mortality<br>- HQ alone vs no HQ: HR, 1.02; 95% CI, 0.83 – 1.27; p = 0.83<br>- AZ alone vs no AZ: HR, 0.89; 95% CI, 0.72 – 1.10; p = 0.28<br>- HQ + AZ vs neither: HR, 0.98; 95% CI, 0.75–1.28; p = 0.89                                                                                | Not reported                                                                                                                                                                                                                                                                                                                                | - Sampling bias as data was collected from convenience sample<br>- Better to use propensity matching than stratification                                                                                               |

|                                         |                                                                                                      |                                                                                                                                                                                                  |                                                                                                                                                                         |                                                                                                                                                                                                                                                                                                                                                                                                                                                            |                                                                                                          |                                                                                                                                                                                                                                                                                                                                                                         |
|-----------------------------------------|------------------------------------------------------------------------------------------------------|--------------------------------------------------------------------------------------------------------------------------------------------------------------------------------------------------|-------------------------------------------------------------------------------------------------------------------------------------------------------------------------|------------------------------------------------------------------------------------------------------------------------------------------------------------------------------------------------------------------------------------------------------------------------------------------------------------------------------------------------------------------------------------------------------------------------------------------------------------|----------------------------------------------------------------------------------------------------------|-------------------------------------------------------------------------------------------------------------------------------------------------------------------------------------------------------------------------------------------------------------------------------------------------------------------------------------------------------------------------|
| Magagnoli et al.<br>Aug 2020<br>[41]    | Multicentric, retrospective cohort study, USA<br><br>Hospitalized patients with confirmed infection  | <b>HQ alone (n = 198)</b><br><b>HQ + AZ (n = 214)</b><br><b>Neither (n = 395)</b><br><br>Dosing:<br>Different regimens                                                                           | Mortality, use of MV                                                                                                                                                    | Propensity score adjusted (regression on propensity splines) hazard ratio for risk of death from any cause<br>- HQ alone vs neither: HR, 1.83; 95% CI 1.16 - 2.89; p = 0.009<br>- HQ + AZ vs neither: HR, 1.31; 95% CI 0.80 - 2.15; p = 0.28<br><br>Propensity score adjusted hazard ratio for risk of mechanical ventilation<br>- HQ alone vs neither: HR, 1.19; 95% CI, 0.78–1.82; p = 0.42<br>- HQ + AZ vs neither: HR, 1.09; 95% CI, 0.72–1.66; p=0.69 | Not reported                                                                                             | - Factors that may have influenced treatment decisions (e.g. palliative care) are possibly not accounted for in propensity scoring for multivariate regression<br>- Loss of significance for addition of AZ suggests indication bias or effect from AZ                                                                                                                  |
| Sekhavati et al.<br>August 2020<br>[42] | Monocentric, open label RCT, Teheran<br><br>Hospitalized patients with confirmed disease             | <b>AZ + HQ + LPV/R (n = 56)</b><br><b>HQ + LPV/R (n = 55)</b><br><br>Dosing:<br><i>AZ 500mg od 5 days</i><br><i>HQ 400mg od 5 days</i><br><i>Liponavir/ritonavir 400/100mg bid 5 days</i>        | Vital signs, hypoxia, duration of hospitalisation, need for and length of intensive care unit admission, mortality rate and results of 30-day follow-up after discharge | Duration of hospitalization<br>- AZ group 4.61 days vs non-AZ group 5.96 days; p = 0.02<br><br>Mean duration of ICU stay:<br>- AZ-group 5 days vs non-AZ group 4.43 days; p = 0.157<br><br>NB: Also, better oxygenation at discharge for AZ-group                                                                                                                                                                                                          | No adverse events while using a risk scoring system to exclude patients at high risk for QT-prolongation | - ICU admission was less for AZ-group (2) versus non-AZ group (7), which was not significant but could with this low numbers have significantly impacted length of stay<br>- Exclusion for high risk of QT-prolongation would have better been done before study inclusion rather than after inclusion in AZ group per protocol, but no such patients occurred in study |
| Albani et al.<br>Aug 2020<br>[43]       | Monocentric, retrospective cohort study, Italy<br><br>Hospitalized patients with confirmed infection | <b>HQ alone (n = 211)</b><br><b>AZ alone (n = 421)</b><br><b>HQ + AZ (n = 166)</b><br><b>Neither (n = 605)</b><br><br>Dosing:<br><i>HQ: 200mg bid 5-7 days</i><br><i>AZ: 500mg od for 5 days</i> | In-hospital mortality                                                                                                                                                   | Overlap weighted propensity score adjusted odds ratio for in hospital mortality<br>- AZ alone vs neither: OR, 0.60; 95% CI, 0.42–0.85<br>- HQ alone vs neither OR, 0.76; 95% CI, 0.53–1.08<br>- HQ + AZ vs neither: OR, 1.13; 95% CI, 0.77–1.69                                                                                                                                                                                                            | Not reported                                                                                             | - Factors that may have influenced treatment decisions (e.g. palliative care) or some measures for disease severity (lymphocytes, D-dimers) were not accounted for in multivariate regression                                                                                                                                                                           |

|                                               |                                                                                                                                   |                                                                                                                                                                                                                               |                                                                                          |                                                                                                                                                                                                                                                                                                                                                                                              |                                                                                                                               |                                                     |
|-----------------------------------------------|-----------------------------------------------------------------------------------------------------------------------------------|-------------------------------------------------------------------------------------------------------------------------------------------------------------------------------------------------------------------------------|------------------------------------------------------------------------------------------|----------------------------------------------------------------------------------------------------------------------------------------------------------------------------------------------------------------------------------------------------------------------------------------------------------------------------------------------------------------------------------------------|-------------------------------------------------------------------------------------------------------------------------------|-----------------------------------------------------|
| Rodriguez-Molinero et al.<br>Sep 2020<br>[44] | Multicentric, retrospective cohort study, Spain<br><br>Hospitalized patients with confirmed infection                             | <b>Regimen without AZ (n = 29) or with AZ (n = 29)</b><br>Matched subcohorts<br><br><b>Regimen without AZ (n = 63) or with AZ (n = 120)</b><br>Unmatched subcohorts<br><br>Dosing:<br>AZ: 500mg od day 1 and 250mg od day 2-5 | O <sub>2</sub> /FiO <sub>2</sub> at 48 hours after inclusion and length of hospital stay | Mean difference in O <sub>2</sub> /FiO <sub>2</sub> at 48 hours of matched subcohorts<br>- AZ vs no AZ: Δ O <sub>2</sub> /FiO <sub>2</sub> , 0.02%; 95% CI, -1.35% - 1.39%; p=0.980<br>Adjusted Cox regression hazard ratio for time to discharge in unmatched cohorts<br>- AZ vs no AZ: HR, 1.45; 95% CI, 0.88-2.41; p=0.150                                                                | Insufficient events to draw conclusions                                                                                       | - Small sample sizes, especially after matching.    |
| Furtado et al.<br>Sep 2020<br>[45]            | Multicentric open label randomized controlled trial, Brazil<br><br>Hospitalized patients with confirmed infection, severe disease | <b>HQ alone (n = 183)</b><br><b>HQ + AZ (n = 214)</b><br><br>Dosing:<br>HQ: 400mg bid 10 days<br>AZ: 500mg od 10 days                                                                                                         | Clinical status on day 15                                                                | Proportional odds of being in worse clinical category:<br>- AZ + HQ vs HQ: OR, 1.36; 95% CI, 0.94–1.97; p=0.11                                                                                                                                                                                                                                                                               | Proportion of patients with any serious adverse event was 42% in the azithromycin group and 38% in the control group (p=0.35) | - Large estimated effect size limits power analysis |
| Lauriola et al.<br>Sep 2020<br>[46]           | Monocentric, retrospective cohort study, Italy<br><br>Hospitalized patients with confirmed infection                              | <b>HQ alone (n = 17)</b><br><b>HQ + AZ (n = 297)</b><br><b>neither (n = 63)</b><br><br>Dosing:<br>HQ: 200mg bid 10 days<br>AZ: 500mg od 10 days                                                                               | In-hospital mortality                                                                    | Adjusted Cox regression hazard ratio for in hospital mortality<br>- HQ alone vs neither: HR 1.108; 95% CI, 0.536 – 2.293; p=0.782<br>- HQ + AZ vs neither: HR, 0.265; 95% CI, 0.171-0.412; p<0.001                                                                                                                                                                                           | No fatal arrhythmias have been observed during treatment                                                                      | - Small sample size, monocentric                    |
| Ayerbe et al.<br>Sep<br>[47]                  | Multicentric, retrospective cohort study, Spain<br><br>Hospitalized patients with confirmed infection                             | <b>HQ alone (n = 670)</b><br><b>HQ + AZ (n = 1187)</b><br><b>neither (n = 162)</b><br><br>Dosing:<br>HQ: 400mg bid day 1, 200mg bid day 2-5<br>AZ: not reported                                                               | Mortality (over study window: March – April)                                             | Multivariate logistic regression adjusted odds ratio for mortality for AZ + HQ vs HQ alone (3th of 4 tested models):<br>- main effect of AZ on mortality: OR, 0.53; 95% CI, 0.19-1.50; p = 0.233<br>- No interaction effect between AZ and HQ on mortality: OR, 1.11; 95% CI, 0.38 – 3.29; p = 0.846<br>NB: HQ was associated with lower mortality: OR, 0.45; 95% CI, 0.30 – 0.68; p < 0.001 | Not reported                                                                                                                  |                                                     |

|                                   |                                                                                                                                                                             |                                                                                                                                                                                                                                                                                                                                                                                                                 |                                              |                                                                                                                                                                                                                                                                                                                 |                                                                                                                                                          |                                                                                                                                                                                                                                                       |
|-----------------------------------|-----------------------------------------------------------------------------------------------------------------------------------------------------------------------------|-----------------------------------------------------------------------------------------------------------------------------------------------------------------------------------------------------------------------------------------------------------------------------------------------------------------------------------------------------------------------------------------------------------------|----------------------------------------------|-----------------------------------------------------------------------------------------------------------------------------------------------------------------------------------------------------------------------------------------------------------------------------------------------------------------|----------------------------------------------------------------------------------------------------------------------------------------------------------|-------------------------------------------------------------------------------------------------------------------------------------------------------------------------------------------------------------------------------------------------------|
| Lammers et al.<br>Sep<br>[48]     | Multicentric, observational cohort study, The Netherlands<br><br>Hospitalized patients with confirmed infection or typical disease findings on CT, mild to moderate disease | <b>HQ/CQ alone (n = 487)</b><br><b>HQ/CQ + AZ (n = 79)</b><br><b>AZ alone (n = 131)</b><br><b>neither (n = 367)</b><br><br><i>Dosing</i><br><i>HQ: 400mg bid day 1, 200mg bid day 2-5</i><br><i>AZ: not reported</i>                                                                                                                                                                                            | Death and ICU admission (composite endpoint) | Logrank test shows no difference in Kaplan-Meier curves for reaching composite endpoint of death or ICU admission with or without AZ (p = 0.071)<br><br>NB: HQ but not CQ was associated with decreased propensity adjusted hazard ratio for reaching composite endpoint: HR, 0.68; 95% CI, 0.49-0.95; p = 0.24 | Not reported                                                                                                                                             | - Propensity matching was done for HQ and not for AZ<br>- Factors that may have influenced treatment decisions (e.g. palliative care) or some measures for disease severity (lymphocytes, D-dimers) were not accounted for in multivariate regression |
| Annie et al.<br>Oktober<br>[49]   | Multicentric, retrospective cohort study<br><br>Hospitalized patients with confirmed infection                                                                              | <b>HQ alone (n = 367) vs no HQ (n = 367)</b><br><b>HQ + AZ (n = 199) vs no HQ (n = 199)</b><br><b>(propensity matched sample taken from 3012 hospitalized patients)</b><br><br><i>Dosing: not reported</i>                                                                                                                                                                                                      | All-cause 30-days mortality                  | Propensity score matched odds ratio for mortality<br>- HQ alone vs neither: OR, 0.95; 95% CI, 0.62 – 1.46; p = 0.828<br>- HQ + AZ vs neither: OR, 1.24; 95% CI 0.70 – 2.22; p = 0.461                                                                                                                           | Propensity matched odds ratio for composite of overall mortality and arrhythmia:<br>- HQ + AZ vs neither: OR, 1.00; 95% CI, 0.59 – 1.69; p = 1.00        | - Factors that may have influenced treatment decisions (e.g. palliative care) or some measures for disease severity (lymphocytes, D-dimers) were not accounted for in multivariate regression                                                         |
| Szente et al.<br>November<br>[50] | Prospective observational study<br><br>Outpatients with confirmed infection                                                                                                 | <b>HQ, AZ, prednisolone, zinc sulphate, ivermectin and oseltamivir were allowed</b><br><br><b>AZ without HQ or prednisone (n = 106)</b><br><b>AZ combined with HQ or prednisone (n = 489)</b><br><b>No antiviral treatment (n = 122)</b><br><br><i>Dosing:</i><br><i>HQ: 400mg bid day 1, 400mg od day 2-5</i><br><i>Predni: 1mg/kg od 5 days starting not earlier than day 6</i><br><i>AZ: 500mg od 5 days</i> | Hospitalization risk                         | Multivariate logistic regression adjusted odds ratio for hospitalization<br>- AZ vs no AZ containing regimens: OR, 0.93; 95% CI 0.72 – 1.90)                                                                                                                                                                    | No cardiac arrhythmia events requiring medication termination for any of the medications used were observed, not deaths attributable to such arrhythmias | - Of initial sample of 25000 patients, only 717 with confirmed infection were analyzed<br>- Indication bias may still exist despite multivariate correction                                                                                           |

| META ANALYSES                     |                                                                                    |                                                                                                      |                                                     |                                                                                                                                                                                                                 |                                                                                                                                                                                                                                       |                                                                                                                                                                                                                                                                                                                                                                      |
|-----------------------------------|------------------------------------------------------------------------------------|------------------------------------------------------------------------------------------------------|-----------------------------------------------------|-----------------------------------------------------------------------------------------------------------------------------------------------------------------------------------------------------------------|---------------------------------------------------------------------------------------------------------------------------------------------------------------------------------------------------------------------------------------|----------------------------------------------------------------------------------------------------------------------------------------------------------------------------------------------------------------------------------------------------------------------------------------------------------------------------------------------------------------------|
| Patel et al.<br>June 2020<br>[51] | Systematic review and meta-analysis; uses data Magagnoli et al, Rosenberg et al    | <b>HQ + AZ (n = 854) vs SOC (n = 395)</b><br><br><b>HQ + AZ (n = 854) vs HQ alone (n = 388)</b>      | All-cause mortality                                 | Odds ratio for death<br>- HQ + AZ vs neither: OR, 2.33; 95% CI, 1.63 - 3.34; p < 0.00001<br>- HQ + AZ vs HQ alone: OR, 1.07; 95% CI, 0.58 - 1.98; p = 0.83                                                      | Increased all-cause mortality but causes not assessed                                                                                                                                                                                 |                                                                                                                                                                                                                                                                                                                                                                      |
| Das et al.<br>July 2020<br>[52]   | Meta-analysis using data from Magagnoli et al, Rosenberg et al for AZ assessment   | <b>HQ alone (n = 3481)</b><br><b>HQ + AZ (n = 1145)</b><br><b>Neither (n = 1165)</b>                 | All-cause mortality                                 | Odds ratio for death<br>- HQ alone vs neither: OR, 0.87; 95% CI, 0.46 - 1.64; p 0.66<br>- HQ + AZ vs neither: OR, 2.84; 95% CI, 2.19-3.69; p < 0.001<br>- HQ vs HQ + AZ: OR, 0.7; 95% CI, 0.54 - 0.9; p = 0.006 | - HQ + AZ associated with increased mortality (HQ alone vs HQ + AZ OR 0.7)<br>- HQ +/- AZ was associated with increased occurrence of cardiac adverse events but no difference in cardiac adverse events between HQ alone and HQ + AZ | - The outcomes that favoured HQ over HQ + AZ were not cardiac adverse events but mortality rate and development of severe disease; little mechanistic rationale to expect disease worsening with association of AZ and effect may thus be due to residual indication bias                                                                                            |
| Fiolet et al.<br>August [53]      | Meta-analysis using data from Ip et al, Magagnoli et al, Rosenberg et al, Ip et al | <b>HQ alone (n = 11932)</b><br><b>AZ + HQ (8081)</b><br><b>Neither (n = 12930)</b>                   | Mortality                                           | Relative risk for death<br>- HQ alone vs neither: RR, 0.83; 95% CI, 0.65 - 1.06<br>- HQ + AZ vs neither: RR, 1.27; 95% CI, 1.04 - 1.54                                                                          | - HQ + AZ associated with increased mortality                                                                                                                                                                                         |                                                                                                                                                                                                                                                                                                                                                                      |
| Yang et al.<br>September<br>[54]  | Meta-analysis using data from Magagnoli et al, Rosenberg et al                     | <b>HQ alone (n = 451) vs neither (n = 930)</b><br><br><b>HQ + AZ (n = 854) vs neither (n = 395)</b>  | All-cause mortality, progression to severe illness  | Odds ratio for death<br>- HQ alone vs neither: OR, 1.23; 95% CI, 0.38 - 3.97; p = 0.73<br>- HQ + AZ vs neither: OR, 2.34; 95% CI, 1.63-3.36; p < 0.00001                                                        | - HQ + AZ associated with increased mortality<br>- Trend towards QT prolongation in HQ treatment did not reach significance                                                                                                           | - Duration of follow up (< 14 days or > 14 days) reduces mortality difference (early CV side effects but long term infection reduction?)<br>- Trend towards increased progression to severe disease in combination treatment; little mechanistic rationale to expect disease worsening with association of AZ and effect may thus be due to residual indication bias |
| Kashour et al.<br>Oktober<br>[55] | Meta-analysis using data from Rosenberg et al, Magagnoli et al, Kuderer et al,     | <b>15938 patients to assess effect of HQ</b><br><br><b>3430 patients to assess effect of HQ + AZ</b> | Short-term mortality                                | Adjusted OR on short term mortality:<br>- HQ alone vs neither: effect estimate, 1.05; 95% CI, 0.96 - 1.15; p = 0.647<br>- HQ + AZ vs neither: effect estimate, 1.32; 95% CI, 1.00 - 1.75; p = 0.008             | - HQ + AZ associated with increased short-term mortality                                                                                                                                                                              |                                                                                                                                                                                                                                                                                                                                                                      |
| Mega et al.<br>Oktober<br>[56]    | Meta-analysis using data from Magagnoli et al, Rosenberg et al                     | <b>HQ + AZ (n = 729)</b><br><b>HQ alone (n = 1684)</b>                                               | All-cause mortality, ICU admission, QT prolongation | Odds ratio for composite of death or ICU admission<br>- HQ vs HQ + AZ: OR, 0.88; 95% CI, 0.55-1.43; p = 0.61                                                                                                    | Odds ratio for QT prolongation:<br>- HQ + AZ vs HQ alone: OR, 1.11; 95% CI, 0.54 - 2.28; p=0.79                                                                                                                                       |                                                                                                                                                                                                                                                                                                                                                                      |



---

AZ: azithromycin, CI: confidence interval, CQ: chloroquine, HQ: hydroxychloroquine, HR: hazard ratio,  $O_2/FiO_2$ : ratio of oxygen saturation (%) over fraction of inspired oxygen (%), MV: mechanical ventilation, OR: odds ratio, RCT: randomized controlled trial, RR: relative risk

**References:**

- 1 Guérin V, Lévy P, Thomas J-L, *et al.* Azithromycin and Hydroxychloroquine Accelerate Recovery of Outpatients with Mild/Moderate COVID-19. *Asian J Med Heal* 2020;**18**:45–55. doi:10.9734/ajmah/2020/v18i730224
- 2 Geleris J, Sun Y, Platt J, *et al.* Observational Study of Hydroxychloroquine in Hospitalized Patients with Covid-19. *N Engl J Med* 2020;**382**:2411–8. doi:10.1056/nejmoa2012410
- 3 Mori N, Katayama M, Nukaga S. Triple therapy with hydroxychloroquine, azithromycin, and ciclesonide for COVID-19 pneumonia. *J Microbiol Immunol Infect* Published Online First: 2020. doi:10.1016/j.jmii.2020.09.003
- 4 Calles A, Aparicio MI, Alva M, *et al.* Outcomes of COVID-19 in Patients With Lung Cancer Treated in a Tertiary Hospital in Madrid. *Front Oncol* 2020;**10**. doi:10.3389/fonc.2020.01777
- 5 Lubetzky M, Aull MJ, Craig-Schapiro R, *et al.* Kidney allograft recipients, immunosuppression, and coronavirus disease-2019: a report of consecutive cases from a New York City transplant center. *Nephrol Dial Transplant* 2020;**35**:1250–61. doi:10.1093/ndt/gfaa154
- 6 Enzmann MO, Erickson MP, Grindeland CJ, *et al.* Treatment and Preliminary Outcomes of 150 Acute Care Patients with COVID-19 in a Rural Health System in the Dakotas. *Epidemiol Infect* 2020;**148**. doi:10.1017/S0950268820001351
- 7 Ng KK, Ng MK, Zhyvotovska A, *et al.* Acute Respiratory Failure Secondary to COVID-19 Viral Pneumonia Managed With Hydroxychloroquine/Azithromycin Treatment. *Cureus* 2020;**12**. doi:10.7759/cureus.8268
- 8 Vahedi E, Ghanei M, Ghazvini A, *et al.* The clinical value of two combination regimens in the Management of Patients Suffering from Covid-19 pneumonia: a single centered, retrospective, observational study. *DARU, J Pharm Sci* Published Online First: 2020. doi:10.1007/s40199-020-00353-w
- 9 Takahashi N, Abe R, Hattori N, *et al.* Clinical course of a critically ill patient with severe acute respiratory syndrome coronavirus 2 (SARS-CoV-2). *J Artif Organs* Published Online First: 2020. doi:10.1007/s10047-020-01183-y
- 10 Guvenmez O, Keskin H, Ay B, *et al.* The comparison of the effectiveness of lincocin® and azitro® in the treatment of covid-19-associated pneumonia: A prospective study. *J Popul Ther Clin Pharmacol* 2020;**27**:5–10. doi:10.15586/jptcp.v27iSP1.684
- 11 Hor CP, Hussin N, Nalliah S, *et al.* Experience of short-term hydroxychloroquine and azithromycin in COVID-19 patients and effect on QTc trend. *J. Infect.* 2020;**81**:e117–9. doi:10.1016/j.jinf.2020.05.058
- 12 Das S, Bhowmick S, Tiwari S, *et al.* An Updated Systematic Review of the Therapeutic Role of Hydroxychloroquine in Coronavirus Disease-19 (COVID-19). *Clin. Drug Investig.* 2020;**40**:591–601. doi:10.1007/s40261-020-00927-1
- 13 Hraiech S, Bourenne J, Kuteifan K, *et al.* Lack of viral clearance by the combination of hydroxychloroquine and azithromycin or lopinavir and ritonavir in SARS-CoV-2-related acute respiratory distress syndrome. *Ann. Intensive Care.* 2020;**10**. doi:10.1186/s13613-020-00678-4
- 14 Gheysarzadeh A, Sadeghifard N, Safari M, *et al.* Report of five nurses infected with severe acute respiratory syndrome coronavirus 2 during patient care: case series. *New Microbes New Infect.* 2020;**36**. doi:10.1016/j.nmni.2020.100694
- 15 Aranda-Abreu GE, Aranda-Martínez JD, Araújo R, *et al.* Observational study of people infected with SARS-Cov-2, treated with amantadine. *Pharmacol Reports* Published Online First: 2020. doi:10.1007/s43440-020-00168-1
- 16 Louhaichi S, Allouche A, Baili H, *et al.* Features of patients with 2019 novel coronavirus admitted in a pneumology department: The first retrospective Tunisian case series. *Tunisie Medicale* 2020;**98**:261–5.
- 17 Wang D, Hu B, Hu C, *et al.* Clinical Characteristics of 138 Hospitalized Patients with 2019 Novel Coronavirus-Infected Pneumonia in Wuhan, China. *JAMA - J Am Med Assoc* 2020;**323**:1061–9. doi:10.1001/jama.2020.1585
- 18 Castelnovo A Di, Costanzo S, Antinori A, *et al.* Use of hydroxychloroquine in hospitalised COVID-19 patients

- is associated with reduced mortality: Findings from the observational multicentre Italian CORIST study. *Eur J Intern Med* 2020;**0**. doi:10.1016/j.ejim.2020.08.019
- 19 Lopez A, Duclos G, Pastene B, *et al*. Effects of Hydroxychloroquine on Covid-19 in Intensive Care Unit Patients: Preliminary Results. *Int J Antimicrob Agents* 2020;**56**:106136. doi:10.1016/j.ijantimicag.2020.106136
- 20 Gautret P, Lagier JC, Parola P, *et al*. Hydroxychloroquine and azithromycin as a treatment of COVID-19: results of an open-label non-randomized clinical trial. *Int J Antimicrob Agents* 2020;**56**:105949. doi:10.1016/j.ijantimicag.2020.105949
- 21 Nachega JB, Ishoso DK, Otokoye JO, *et al*. Clinical Characteristics and Outcomes of Patients Hospitalized for COVID-19 in Africa: Early Insights from the Democratic Republic of the Congo. *Am J Trop Med Hyg* 2020;**;**3–5. doi:10.4269/ajtmh.20-1240
- 22 Huang HD, Jneid H, Aziz M, *et al*. Safety and Effectiveness of Hydroxychloroquine and Azithromycin Combination Therapy for Treatment of Hospitalized Patients with COVID-19: A Propensity-Matched Study. *Cardiol Ther* 2020;**;**523–34. doi:10.1007/s40119-020-00201-7
- 23 Coll E, Fernández-Ruiz M, Sánchez-Álvarez JE, *et al*. Covid-19 in transplant recipients: the spanish experience. 2020. doi:10.1111/ajt.16369
- 24 Derwand R, Scholz M, Zelenko V. low-dose hydroxychloroquine and azithromycin : a retrospective case series study. *Int J Antimicrob Agents* Published Online First: 2020. doi:10.1016/j.ijantimicag.2020.106214
- 25 Million M, Lagier J-C, Gautret P, *et al*. Early treatment of COVID-19 patients with hydroxychloroquine and azithromycin: A retrospective analysis of 1061 cases in Marseille, France. *Travel Med Infect Dis* 2020;**35**:101738. doi:10.1016/j.tmaid.2020.101738
- 26 Molina JM, Delaugerre C, Le Goff J, *et al*. No evidence of rapid antiviral clearance or clinical benefit with the combination of hydroxychloroquine and azithromycin in patients with severe COVID-19 infection. *Med. Mal. Infect.* 2020;**50**:384. doi:10.1016/j.medmal.2020.03.006
- 27 Gautret P, Lagier J-C, Parola P, *et al*. Clinical and microbiological effect of a combination of hydroxychloroquine and azithromycin in 80 COVID-19 patients with at least a six-day follow up: A pilot observational study. *Travel Med Infect Dis* 2020;**34**:101663. doi:10.1016/j.tmaid.2020.101663
- 28 Esper RB, da Silva RS, Costa Oikawa FT, *et al*. Empirical treatment with hydroxychloroquine and azithromycin for suspected cases of COVID-19 followed-up by telemedicine. 2020;**;**1–25. <https://pgibertie.files.wordpress.com/2020/04/2020.04.15-%0Ajournal-manuscript-final.pdf>.
- 29 Aversa M, Benvenuto L, Anderson M, *et al*. COVID-19 in lung transplant recipients: A single center case series from New York City. *Am J Transplant* 2020;**20**:3072–80. doi:10.1111/ajt.16241
- 30 Ali T, Al-Ali A, Fajji L, *et al*. Coronavirus Disease-19. *Transplantation* 2020;**Publish Ah**. doi:10.1097/tp.0000000000003433
- 31 Kalligeros M, Shehadeh F, Atalla E, *et al*. Hydroxychloroquine use in hospitalised patients with COVID-19: An observational matched cohort study. *J Glob Antimicrob Resist* 2020;**22**:842–4. doi:10.1016/j.jgar.2020.07.018
- 32 Mazzitelli M, Davoli C, Scaglione V, *et al*. Apparent inefficacy of hydroxychloroquine combined with azithromycin on SARS-CoV-2 clearance in an incident cohort of geriatric patients with COVID-19. *Travel Med. Infect. Dis.* 2020;**37**. doi:10.1016/j.tmaid.2020.101826
- 33 Kuderer NM, Choueiri TK, Shah DP, *et al*. Clinical impact of COVID-19 on patients with cancer (CCC19): a cohort study. *Lancet* 2020;**395**:1907–18. doi:10.1016/S0140-6736(20)31187-9
- 34 Rosenberg ES, Dufort EM, Udo T, *et al*. Association of Treatment With Hydroxychloroquine or Azithromycin With In-Hospital Mortality in Patients With COVID-19 in New York State. *JAMA* 2020;**323**:2493–502. doi:10.1001/jama.2020.8630
- 35 Arshad S, Kilgore P, Chaudhry ZS, *et al*. Treatment with hydroxychloroquine, azithromycin, and combination in patients hospitalized with COVID-19. *Int J Infect Dis* 2020;**97**:396–403. doi:10.1016/j.ijid.2020.06.099
- 36 Tanriverdi E, Çörtük M, Yildirim BiZ, *et al*. The use of hydroxychloroquine plus azithromycin and early hospital

- admission are beneficial in Covid-19 patients: Turkey experience with real-life data. *Turkish J Med Sci* 2020;**Online ahe**. doi:10.3906/sag-2005-82
- 37 Satlin MJ, Goyal P, Magleby R, *et al*. Safety, tolerability, and clinical outcomes of hydroxychloroquine for hospitalized patients with coronavirus 2019 disease. *PLoS One* 2020;**15**:e0236778. doi:10.1371/journal.pone.0236778
- 38 Cavalcanti AB, Zampieri FG, Rosa RG, *et al*. Hydroxychloroquine with or without Azithromycin in Mild-to-Moderate Covid-19. *N Engl J Med* Published Online First: 23 July 2020. doi:10.1056/NEJMoa2019014
- 39 Monforte A d'Arminio, Tavelli A, Bai F, *et al*. Since January 2020 Elsevier has created a COVID-19 resource centre with free information in English and Mandarin on the novel coronavirus COVID-19. The COVID-19 resource centre is hosted on Elsevier Connect, the company's public news and information. *Int J Infect Dis* 2020;**99**:75–6.
- 40 Ip A, Berry DA, Hansen E, *et al*. Hydroxychloroquine and tocilizumab therapy in COVID-19 patients—An observational study. *PLoS One* 2020;**15**:e0237693. doi:10.1371/journal.pone.0237693
- 41 Magagnoli J, Narendran S, Pereira F, *et al*. Outcomes of Hydroxychloroquine Usage in United States Veterans Hospitalized with COVID-19. *Med* Published Online First: 2020. doi:https://doi.org/10.1016/j.medj.2020.06.001
- 42 Sekhavati E, Jafari F, SeyedAlinaghi SA, *et al*. Safety and effectiveness of azithromycin in patients with COVID-19: An open-label randomised trial. *Int J Antimicrob Agents* 2020;**56**:106143. doi:10.1016/j.ijantimicag.2020.106143
- 43 Albani F, Fusina F, Giovannini A, *et al*. Impact of Azithromycin and/or Hydroxychloroquine on Hospital Mortality in COVID-19. *J Clin Med* 2020;**9**. doi:10.3390/jcm9092800
- 44 Rodríguez-Molinero A, Pérez-López C, Gálvez-Barrón C, *et al*. Observational study of azithromycin in hospitalized patients with COVID-19. *PLoS One* 2020;**15**:1–13. doi:10.1371/journal.pone.0238681
- 45 Furtado RHM, Berwanger O, Fonseca HA, *et al*. Azithromycin in addition to standard of care versus standard of care alone in the treatment of patients admitted to the hospital with severe COVID-19 in Brazil (COALITION II): a randomised clinical trial. *Lancet* Published Online First: 21 September 2020. doi:10.1016/S0140-6736(20)31862-6
- 46 Lauriola M, Pani A, Ippoliti G, *et al*. Effect of combination therapy of hydroxychloroquine and azithromycin on mortality in COVID-19 patients. *Clin Transl Sci* 2020;**n/a**. doi:10.1111/cts.12860
- 47 Ayerbe L, Risco-Risco C, Ayis S. The association of treatment with hydroxychloroquine and hospital mortality in COVID-19 patients. *Intern Emerg Med* 2020;**15**:1501–6. doi:10.1007/s11739-020-02505-x
- 48 Lammers AJJ, Brohet RM, Theunissen REP, *et al*. Early Hydroxychloroquine but not Chloroquine use reduces ICU admission in COVID-19 patients. *Int J Infect Dis* 2020;**101**:283. doi:10.1016/j.ijid.2020.09.1460
- 49 Annie FH, Sirbu C, Frazier KR, *et al*. Hydroxychloroquine in hospitalized COVID-19 patients: Real world experience assessing mortality. *Pharmacother J Hum Pharmacol Drug Ther* 2020;**0–2**. doi:10.1002/phar.2467
- 50 Szenté SNF, De Queiroz Sousa A, Wolkoff AG, *et al*. Risk of hospitalization for Covid-19 outpatients treated with various drug regimens in Brazil: Comparative analysis. *Travel Med Infect Dis* 2020;**38**. doi:https://doi.org/10.1016/j.tmaid.2020.101906 Received
- 51 Patel TK, Barvaliya M, Kevadiya BD, *et al*. Does Adding of Hydroxychloroquine to the Standard Care Provide any Benefit in Reducing the Mortality among COVID-19 Patients?: a Systematic Review. *J Neuroimmune Pharmacol* 2020;**15**:350–8. doi:10.1007/s11481-020-09930-x
- 52 Das RR, Jaiswal N, Dev N, *et al*. Efficacy and Safety of Anti-malarial Drugs (Chloroquine and Hydroxy-Chloroquine) in Treatment of COVID-19 Infection: A Systematic Review and Meta-Analysis. *Front Med* 2020;**7**:482. doi:10.3389/fmed.2020.00482
- 53 Fiolet T, Guihur A, Rebeaud ME, *et al*. Effect of hydroxychloroquine with or without azithromycin on the mortality of coronavirus disease 2019 (COVID-19) patients: a systematic review and meta-analysis. *Clin. Microbiol. Infect.* 2020. doi:10.1016/j.cmi.2020.08.022

- 54 Yang T-H, Chou C-Y, Yang Y-F, *et al.* *Systematic Review and Meta-analysis of the Effectiveness and Safety of Hydroxychloroquine in Treating COVID-19 Patients*. 2020. doi:10.1097/jcma.0000000000000425
- 55 Kashour Z, Riaz M, Garbati MA, *et al.* Efficacy of chloroquine or hydroxychloroquine in COVID-19 patients: a systematic review and meta-analysis. *J Antimicrob Chemother* 2020;:1–13. doi:10.1093/jac/dkaa403
- 56 Ayele Mega T, Feyissa TM, Dessalegn Boshu D, *et al.* The Outcome of Hydroxychloroquine in Patients Treated for COVID-19: Systematic Review and Meta-Analysis. *Can Respir J* 2020;**2020**:1–16. doi:10.1155/2020/4312519
